# Supplementary material
Source: Springer Nature journal article supplement (https://www.springermedizin.de/resource/supplementary/12985_2009_576_MOESM8_ESM.pdf/9608488)
Supplement: MOESM8 [file 9608488]

Table I:  
Primers used to generate expression constructs

|                                                                                                             |
|-------------------------------------------------------------------------------------------------------------|
| <b>NS4B FL</b>                                                                                              |
| Forward primer, GTGGGTACCATGTCACACCTCCCTTACATCGAACAG<br>Reverse primer, TAGTCTAGAGAGCCGGAGCATGGCGTGGAGCAGTC |
| <b>NS4B-CTD</b>                                                                                             |
| Forward primer, GTGGGTACCATGGCGATACTGCGTCGGCACGTGGGC<br>Reverse primer, as NS4B FL                          |
| <b>NS4B-deltaCTD</b>                                                                                        |
| Forward primer, as NS4B FL<br>Reverse primer, TAGTCTAGAGACCGACGCAGTATCGCTGCGCACACGAC                        |
| <b>NS4B-CTD sub-Cys</b>                                                                                     |
| Forward primer, as for NS4B-CTD<br>Reverse primer,<br>AGATCTAGAGAGCCGGAGGATGGCGTGGAGGAGTCCTCGTTGATCCACTG    |
| <b>d-LDH MBD</b>                                                                                            |
| Forward primer, GTGGGTACCATGAAATACGGCAAAGACACCTTCC<br>Reverse primer, TACTCTAGAGAATGCTCGTATTTATCGC          |
